# Supplementary material for: The chimeric multi-domain proteins mediating specific DNA transfer for hepatocellular carcinoma treatment
Source: Cancer Cell Int. 2016 Oct 13;16:80. doi: 10.1186/s12935-016-0351-0 (PMC5062862; doi:10.1186/s12935-016-0351-0)
Supplement: Supplementary file 4 — 10.1186/s12935-016-0351-0 The tumor volumes of HCC mice in different treatment groups. [file 12935_2016_351_MOESM4_ESM.xls]

## Sheet: Sheet1
saline
	1	2	3	4	5	6	mean	STDEV
0	0.081881	0.111118	0.173366	0.172327	0.166333	0.13639	0.140236	0.0343425
2	0.035839	0.197362	0.432956	0.14976	0.215122	0.130404	0.193574	0.1215
4	0.442281	0.267375	0.710892	0.0975	0.371475	0.327777	0.36955	0.186192
6	0.927935	0.446935	1.01637	0.135278	0.366612	0.336007	0.538189	0.321854
8	1.66541	0.856215	1.56318	0.661177	1.12846	0.527222	1.06694	0.429835
10	2.32794	1.20557	1.58913	1.1819	1.07883	0.963787	1.39119	0.461008
12	2.09433	0.952867	1.8241	1.25339	0.767624	1.32516	1.36958	0.462479
14	2.45547	1.49534	1.3762	2.20894	0.932593	1.29542	1.62733	0.531883
16	3.03482	1.29612	2.15271	2.28373	1.52331	2.26981	2.09342	0.565359
18	3.43975	1.86541	2.79669	3.1561	1.79746	3.14683	2.70037	0.642312
20	3.16873	1.92793	3.04683	3.30665	1.44725		2.57948	0.748446
22	3.74294	2.29433	3.14683		1.8591		2.7608	0.732168
24	3.60797	2.35547			2.3132		2.75888	0.600646
26	4.3281	3.23482			2.79769		3.45354	0.643647
28	4.85425	4.43975			2.76552		4.01984	0.902935
30	4.48484	3.96873			2.98238		3.81198	0.623314
32		2.74294			3.49081		3.11687	0.373933
34		3.20797			3.82832		3.51815	0.310177
36		4.6281			4.72329		4.6757	0.0475945
pUAS
	1	2	3	4	5	6	mean	STDEV
0	0.05695	0.05695	0.166972	0.228777	0.153288	0.068979	0.121986	0.0654179
2	0.106849	0.106849	0.70331	0.348075	0.238097	0.041344	0.257421	0.223399
4	0.134952	0.734952	0.871416	0.651389	0.300697	0.11803	0.468573	0.296936
6	0.616705	1.11671	1.00565	0.988499	0.379392	0.186515	0.715579	0.346948
8	1.24463	1.24463	1.33103	1.34095	0.525347	0.58746	1.04568	0.348445
10	1.26737	1.26737	1.41708	2.44236	0.520923	1.10238	1.33625	0.571396
12	1.21091	2.21091	1.80566	3.56668	0.69212	1.14023	1.77108	0.939392
14	1.16447	1.64468	1.63602	3.35036	0.876408	1.88995	1.76032	0.786364
16	1.37256	2.37256	2.44663	4.30622	0.91619	2.18369	2.26631	1.0672
18	1.82878	2.22878	2.6404	4.80415	1.08109	2.61012	2.53222	1.14543
20	2.31608	2.6075	2.55138	4.45498	1.76153	2.20796	2.6499	0.853012
22	2.65764	2.7637		4.63451	2.00375		3.0149	0.979321
24	3.44082	3.44082			2.22809		3.03658	0.571685
26	3.52815	3.52815			3.00697		3.35443	0.245687
28	3.1604	3.6604					3.4104	0.25
30	2.92121	3.92121					3.42121	0.5
32	3.58842	4.48842					4.03842	0.45
34	3.97201	4.97201					4.47201	0.5
36	4.55166	5.1665					4.85908	0.307418
pUAS-Apoptin
	1	2	3	4	5	6	mean	STDEV
0	0.598551	0.081881	0.13639	0.273362	0.073072	0.076134	0.206565	0.188599
2	0.312975	0.17836	0.130404	0.273362	0.101439	0.267378	0.210653	0.0785604
4	0.838024	0.473676	0.327777	0.423074	0.142272	0.330286	0.422518	0.212635
6	0.480655	0.840224	0.336007	0.501523	0.180176	0.372004	0.451765	0.203197
8	1.15453	0.871416	0.527222	0.891596	0.208732	0.705501	0.726499	0.299916
10	1.58506	1.43103	0.963787	1.14336	0.350245	1.24097	1.11907	0.396888
12	1.16974	1.51709	1.32516	1.43286	1.59297	0.958863	1.33278	0.215304
14	1.85108	1.60566	1.29542	1.82037	1.21475	1.42155	1.53481	0.244662
16	1.86711	1.73602	2.26981	2.18688	1.20897	1.75104	1.83664	0.347047
18	2.33226	2.24663	3.9147		1.31005	1.81249	2.32323	0.874771
20	2.74026	2.6404	4.19858		1.41267	2.00013	2.59841	0.932345
22	2.35813				1.97271	2.56561	2.29882	0.245657
24	2.98227				2.16754	2.64818	2.59933	0.3344
26	3.23913				2.17915	3.19485	2.87104	0.489576
28	3.37883				2.38232	3.19487	2.98534	0.432961
30	3.56394				2.50237	2.96767	3.01133	0.434484
32	3.75				2.6485	2.56872	2.98907	0.539041
34	3.80661				2.8917	3.5466	3.41497	0.384933
36	4.10972				3.4018	3.98572	3.83241	0.30867
TG
	1	2	3	4	5	6	mean	STDEV
0	0.062375	0.1053	0.050615	0.166972	0.338514	0.101369	0.137524	0.0973056
2	0.015491	0.173772	0.266044	0.264493	0.473676	0.101458	0.215822	0.14512
4	0.187813	0.155432	1.05062	0.572546	0.142805	0.06712	0.362722	0.347977
6	0.22932	0.103708	1.73116	0.611657	0.11232	0.293734	0.51365	0.570126
8	0.274959	0.275445	2.35839	1.13401	0.130024	0.771239	0.824012	0.767811
10	0.332908	0.844296	2.23085	1.43103	0.871416	1.17167	1.14703	0.589678
12	0.430876	1.18611	2.404	1.08109	1.51709	2.56318	1.53039	0.748259
14	0.65776	1.82168	2.682	2.00375	2.22809	2.58913	1.99707	0.670522
16	0.900081	2.20229	2.7188	2.52056	3.00697	3.1241	2.41213	0.741268
18	0.890562	2.50215	2.9485	3.84415	3.84415	3.77619	2.96762	1.05843
20	1.05073	2.79086	3.18745		4.15363	4.35271	3.10708	1.18168
22	1.3	3.20029				4.29669	2.93233	1.23798
24	1.67838	3.12688				4.74683	3.18403	1.25334
26	2.09955	3.39318					2.74637	0.646816
28	2.71098	3.14885					2.92991	0.218932
30	3.31476						3.31476	0
32	1.97924						1.97924	0
34	3.31193						3.31193	0
36	4.45266						4.45266	0
TNG
	1	2	3	4	5	6	mean	STDEV
0	0.0978432	0.06712	0.066044	0.086533	0.227766	0.39865	0.157326	0.121256
2	0.0358389	0.293734	0.186533	0.140225	0.215122	0.85491	0.287727	0.265345
4	0.0263396	0.224091	0.340225	0.23606	0.200304	0.93264	0.32661	0.286439
6	0.632684	0.14472	0.93606	0.224451	0.402583	1.30461	0.607518	0.407724
8	1.20438	0.32989	1.22445	0.4015	0.513864	1.26243	0.822752	0.41152
10	1.91395	0.70331	1.4015	1.11571	0.642162	2.19607	1.32878	0.578498
12	1.71885	0.637065	1.81571	0.930617	1.35117	2.16661	1.43667	0.525813
14	1.24261	0.771239	2.16472	1.51963	2.34361	2.25951	1.71689	0.583935
16	1.404	1.37167	2.63062	2.23215	2.37614	3.19389	2.20141	0.648723
18	1.5537	1.5025	2.91963	2.12995	2.41128	3.15386	2.27849	0.625102
20	1.48157	1.4099	3.23215	2.37367	3.55571	4.07152	2.68742	1.0125
22	2.12682	2.01637	3.72994	3.96824	3.9799		3.16425	0.897282
24	2.11415	2.76318	4.27367		4.05351		3.30113	0.895854
26	2.71885	2.58913			4.2245		3.17749	0.742235
28	3.48157	2.8241					3.15284	0.328735
30	4.516	3.07619					3.7961	0.719902
32	4.61142	3.85271					4.23206	0.379354
34	4.88796	3.79669					4.34233	0.545634
36	5.08389	4.46318					4.77354	0.310356
TG/pUAS
	1	2	3	4	5	6	mean	STDEV
0	0.102379	0.041344	0.41424	0.238097	0.237838	0.093264	0.18786	0.125161
2	0.101238	0.33639	1.23083	0.300697	0.264902	0.304612	0.423112	0.369141
4	0.143503	0.330404	1.2002	0.379392	0.456449	0.262426	0.462062	0.344087
6	0.082402	0.327777	2.13255	0.525347	0.789872	0.259511	0.686243	0.683574
8	0.181898	0.836007	2.43296	0.520923	0.818813	0.830943	0.936923	0.70906
10	0.253394	1.12722	3.41608	0.69212	1.01369	1.51278	1.33588	1.00764
12	0.208936	1.46379	3.26602	0.876408	1.54475	1.79582	1.52595	0.936424
14	0.283725	2.32516	3.24677	0.91619	2.07489	2.21655	1.84388	0.973538
16	0.662548	2.69542	3.88478	1.08109	2.77985	2.7932	2.31615	1.10354
18	0.834046	3.16981	4.17608	1.76153	3.27451	3.5851	2.80018	1.14129
20	1.1561	3.32516	4.1482	2.00375	3.2435	4.42435	3.05018	1.1467
22	1.30665	3.46379	4.1495	2.22809	3.93314		3.01623	1.08343
24	1.46123	4.57508		2.00697			2.68109	1.35766
26	1.54918			2.13808			1.84363	0.294446
28	2.19384			2.48484			2.33934	0.145504
30	2.6112						2.6112	0
32	2.2464						2.2464	0
34	3.75718						3.75718	0
36	4.33716						4.33716	0
TG/pUAS-Apoptin
	1	2	3	4	5	6	mean	STDEV
0	0.136315	0.208732	0.246898	0.173772	0.06993	0.119043	0.159115	0.0583982
2	0.061535	0.272617	0.273362	0.22932	0.047385	0.204472	0.181448	0.0930357
4	0.047385	0.146289	0.423074	0.340225	0.073116	0.276349	0.21774	0.13883
6	0.142805	0.157122	0.501523	0.633949	0.189563	0.32989	0.325809	0.18545
8	0.219375	0.15386	0.891596	0.503708	0.219953	0.70331	0.448634	0.275637
10	0.264493	0.270825	1.14336	0.675445	0.506797	0.537065	0.566331	0.296563
12	0.475172	0.381012	1.13286	0.744296	1.21658	1.17891	0.854805	0.340111
14	0.572546	0.439942	1.52037	0.96114	1.18908	1.21671	0.983296	0.376322
16	0.5352	1.19389	1.48687	1.06602	1.31818	1.45257	1.17546	0.320517
18	0.611657	1.32618	2.93747	1.21676	1.32778	1.64992	1.51163	0.709135
20	0.82169	1.57657	2.15693	1.2289	1.52716	2.3561	1.61122	0.521286
22	0.880256	1.8598	2.16615	1.39073	2.71117	2.44228	1.9084	0.622271
24	1.13401	2.41406	2.20461	2.02151	2.7704	2.5512	2.18263	0.526137
26	1.88213	2.47396	2.1762	2.38193	2.66003	2.71089	2.38086	0.284648
28	2.52056	2.4451	3.23934	2.981	3.11449	3.2025	2.91717	0.318425
30	2.15997	2.13008	3.6805	3.21476	3.19096	3.53495	2.9852	0.618189
32	2.39669	3.78311	3.38405	3.37924	3.43707		3.27603	0.464462
34	2.5799	3.08683	3.96191	3.51193			3.28514	0.511407
36	2.8723	3.31382	3.93578	3.52661			3.41213	0.383534
TNG/pUAS
	1	2	3	4	5	6	mean	STDEV
0	0.173366	0.097638	0.094648	0.089856	0.246898	0.086533	0.13149	0.0596244
2	0.161101	0.071521	0.15024	0.101369	0.101439	0.140225	0.120982	0.0317512
4	0.160598	0.233428	0.156729	0.576349	0.742272	0.23606	0.350906	0.225427
6	0.156729	0.209664	0.252523	0.878913	1.18018	0.224451	0.483743	0.396638
8	0.163505	0.244633	0.368466	1.21671	1.20873	0.4015	0.60059	0.43983
10	0.219375	0.342222	0.6292	1.24526	1.65024	1.11571	0.867002	0.511496
12	0.475172	0.395102	1.51075	2.26499	1.99297	1.36472	1.33395	0.701461
14	0.525347	0.611657	2.2552	2.3561	2.1762	1.63062	1.59252	0.759965
16	0.473676	0.744118	2.60862	2.44228	2.66003	2.11963	1.84139	0.891811
18	0.520923	1.14753	3.35663	2.5512	2.41406	2.23215	2.03708	0.937704
20	0.840224	1.49094	3.51243	2.71089	3.19096	2.42995	2.36257	0.931983
22	1.13401	1.99518		3.2025	3.31476	2.87367	2.50402	0.82676
24	1.60566	2.01053		3.53495		2.96824	2.52984	0.762599
26	2.15997	2.27427		4.09045			2.84156	0.884329
28	2.22809	3.9147					3.0714	0.843305
30	2.79669	3.34105					3.06887	0.27218
32	3.84415	4.80703					4.32559	0.481438
34	4.15363	5.19858					4.6761	0.522475
36	4.48484	5.574					5.02942	0.544578
TNG/pUAS-Apoptin
	1	2	3	4	5	6	mean	STDEV
0	0.068979	0.066961	0.05695	0.101084	0.066044	0.094648	0.0757777	0.0161745
2	0.041344	0.086515	0.106849	0.101458	0.081881	0.15024	0.0947145	0.0325478
4	0.11803	0.082959	0.134952	0.050619	0.050615	0.156729	0.098984	0.0406745
6	0.086515	0.09132	0.116705	0.038526	0.173116	0.352523	0.143118	0.101878
8	0.08746	0.132139	0.244633	0.081881	0.43143	0.668466	0.274335	0.213339
10	0.202379	0.170825	0.567375	0.098426	0.9132	0.9292	0.480234	0.345287
12	0.540227	0.202289	0.710912	0.141344	1.06118	1.10746	0.627235	0.376422
14	0.889954	0.291059	1.16447	0.247385	1.57508	1.6552	0.970524	0.557222
16	1.18369	0.249397	1.37256	0.530846	1.35839	1.98625	1.11352	0.574436
18	1.61012	0.306359	1.22878	0.853988	1.73085	2.65663	1.39779	0.736682
20	1.70796	0.584307	1.51608	1.0963	2.01404	3.51243	1.73852	0.914488
22	2.31004	0.542571	2.15764	1.35399	2.32682		1.73821	0.696642
24	2.39998	0.73034	2.44082	1.75399	2.7188		2.00878	0.713183
26	2.3328	1.11929	2.52815	2.065	3.03458		2.21596	0.63352
28	2.43922	1.18793	2.6604	2.39132	3.6862		2.47301	0.795763
30	2.47689	1.67352	2.92121	2.71803	4.01869		2.76167	0.757974
32	3.65462	1.7368	3.38842	3.01704			2.94922	0.735703
34	3.6656	1.52195	3.97201	3.21904			3.09465	0.946652
36	3.90201	2.04717	3.95167	3.45399			3.33871	0.770453
	saline	pUAS	pUAS-Apoptin	TG	TNG	TG/pUAS	TG/pUAS-Apoptin	TNG/pUAS	TNG/pUAS-Apoptin
0	0.140236	0.121986	0.206565	0.137524	0.157326	0.18786	0.159115	0.13149	0.075778
2	0.193574	0.257421	0.210653	0.215822	0.287727	0.423112	0.181449	0.120983	0.094715
4	0.36955	0.468573	0.422518	0.362722	0.32661	0.462062	0.21774	0.350906	0.098984
6	0.538189	0.715579	0.451765	0.51365	0.607518	0.686243	0.325809	0.483743	0.143118
8	1.06694	1.04567	0.726499	0.824012	0.822752	0.936923	0.448634	0.600591	0.274335
10	1.39119	1.33625	1.11908	1.14703	1.32878	1.33588	0.566331	0.867002	0.480234
12	1.36958	1.77108	1.33278	1.53039	1.43667	1.52595	0.854806	1.33395	0.627235
14	1.62733	1.76032	1.5348	1.99707	1.71689	1.84388	0.983296	1.59252	0.970524
16	2.09341	2.26631	1.83664	2.41213	2.20141	2.31615	1.17546	1.84139	1.11352
18	2.70038	2.53222	2.32323	2.96762	2.27849	2.80018	1.51163	2.03708	1.39779
20	2.57948	2.6499	2.59841	3.10708	2.68742	3.05018	1.61122	2.36257	1.73852
22	2.7608	3.0149	2.29882	2.93233	3.16425	3.01623	1.9084	2.50402	1.73821
24	2.75888	3.03658	2.59933	3.18403	3.30113	2.68109	2.18263	2.52984	2.00879
26	3.45354	3.35443	2.87104	2.74637	3.17749	1.84363	2.38086	2.84156	2.21596
28	4.01984	3.4104	2.98534	2.92991	3.15284	2.33934	2.91717	3.0714	2.47302
30	3.81198	3.42121	3.01133	3.31476	3.7961	2.6112	2.9852	3.06887	2.76167
32	3.11687	4.03842	2.98907	1.97924	4.23206	2.2464	3.27603	4.32559	2.94922
34	3.51815	4.47201	3.41497	3.31193	4.34233	3.75718	3.28514	4.6761	3.09465
36	4.6757	4.85908	3.83241	4.45266	4.77354	4.33716	3.41213	5.02942	3.33871
	0.034342	0.065418	0.188599	0.097306	0.121256	0.125161	0.058398	0.059624	0.016174
	0.1215	0.223399	0.07856	0.14512	0.265345	0.369141	0.093036	0.031751	0.032548
	0.186192	0.296936	0.212635	0.347977	0.286439	0.344087	0.13883	0.225427	0.040674
	0.321854	0.346948	0.203197	0.570126	0.407724	0.683574	0.18545	0.396638	0.101878
	0.429835	0.348445	0.299916	0.767811	0.41152	0.70906	0.275637	0.43983	0.213339
	0.461008	0.571396	0.396888	0.589678	0.578498	1.00764	0.296563	0.511496	0.345287
	0.462479	0.939392	0.215304	0.748259	0.525813	0.936424	0.340111	0.701461	0.376422
	0.531883	0.786364	0.244662	0.670522	0.583935	0.973538	0.376322	0.759965	0.557222
	0.565359	1.0672	0.347047	0.741268	0.648723	1.10354	0.320517	0.891811	0.574436
	0.642312	1.14543	0.874771	1.05843	0.625102	1.14129	0.709135	0.937704	0.736682
	0.748446	0.853012	0.932345	1.18168	1.0125	1.1467	0.521286	0.931983	0.914488
	0.732168	0.979321	0.245657	1.23798	0.897282	1.08343	0.622271	0.82676	0.696642
	0.600646	0.571685	0.3344	1.25334	0.895854	1.35766	0.526137	0.762599	0.713183
	0.643647	0.245687	0.489576	0.646816	0.742235	0.294447	0.284648	0.884329	0.63352
	0.902935	0.25	0.432961	0.218932	0.328735	0.145504	0.318425	0.843305	0.795763
	0.623314	0.5	0.434484	0	0.719902	0	0.618189	0.272179	0.757974
	0.373934	0.45	0.539041	0	0.379354	0	0.464462	0.481438	0.735703
	0.310176	0.5	0.384933	0	0.545634	0	0.511407	0.522475	0.946652
	0.047594	0.307417	0.30867	0	0.310357	0	0.383534	0.544578	0.770453
	saline	pUAS	pUAS-Apoptin	TG	TNG	TG/pUAS	TG/pUAS-Apoptin	TNG/pUAS	TNG/pUAS-Apoptin
	4.6757	4.85908	3.83241	4.45266	4.77354	4.33716	3.41213	5.02942	3.33871
Suppression rate(%)		-0.0392207	0.180355	0.0477015	-0.0209246	0.072405	0.270242	-0.0756514	0.285945
		-3.92207	18.0355	4.77015	-2.09246	7.2405	27.0242	-7.56514	28.5945
		pUAS	pUAS-Apoptin	TG	TNG	TG/pUAS	TG/pUAS-Apoptin	TNG/pUAS	TNG/pUAS-Apoptin
		-3.92207	18.0355	4.77015	-2.09246	7.2405	27.0242	-7.56514	28.5945

## Sheet: Sheet2
pUAS
	1	2	3	4	5	6
0					0.137569	0.092427
2					0.101458	0.060314
4					0.007188	0.122329
6					0.018687	0.028533
8					0.01404	0.035839
10					0.017039	0
12					0.005537	0
14					0.006327	0
16					0.006327	0
18					0.010235	0
20					0.008125	0
22			0		0.007188	0
24			0		0.003033	0
26			0		0	0
28			0		0	0
30			0		0	0
32			0	3.28055	0	0
34			0	3.31003	0	0
36			0		0	0
pUAS-Apoptin
	1	2	3	4	5	6
0	0.054814			0.092427
2	0.039865			0.060314
4	0.022295			0.122329
6	0.038857			0.028533
8	0.068979			0.035839
10	0.068979			0
12	0.035839			0
14	0.047385			0
16	0.00416			0
18	0			0
20				0
22	0			0
24	0			0
26	0			0
28	0			0
30	0			0
32	0			0
34	0			0
36	0			0
TG
	1	2	3	4	5	6
0
2
4
6	0
8	0
10	0
12	0
14	0
16	0
18	0
20	0
22	0
24	0
26	0				0
28	0				0
30	0				0
32	0				0
34	0				0
36	0				0
TG/pUAS
	1	2	3	4	5	6
0	0.118273			0.083651
2	0.217088			0.136315
4	0.1118			0.09239
6	0.143503			0.086515
8	0.377919			0.086515
10	0.235762			0.077416
12	0.077022			0.00914
14	0.156397			0
16	0.050615			0
18	0			0
20	0			0
22	0	0		0
24	0	0	0	0
26	0	0	0	0
28	0	0	0	0
30	0	0	0	0
32	0	0	0	0
34	0	0	0	0
36	0	0	0	0
